# Supplementary material for: Sequence Evidence in the Archaeal Genomes that tRNAs Emerged Through the Combination of Ancestral Genes as 5′ and 3′ tRNA Halves
Source: PLoS One. 2008 Feb 20;3(2):e1622. doi: 10.1371/journal.pone.0001622 (PMC2237900; doi:10.1371/journal.pone.0001622)
Supplement: Figure S2 — (0.18 MB DOC) [file pone.0001622.s002.doc]

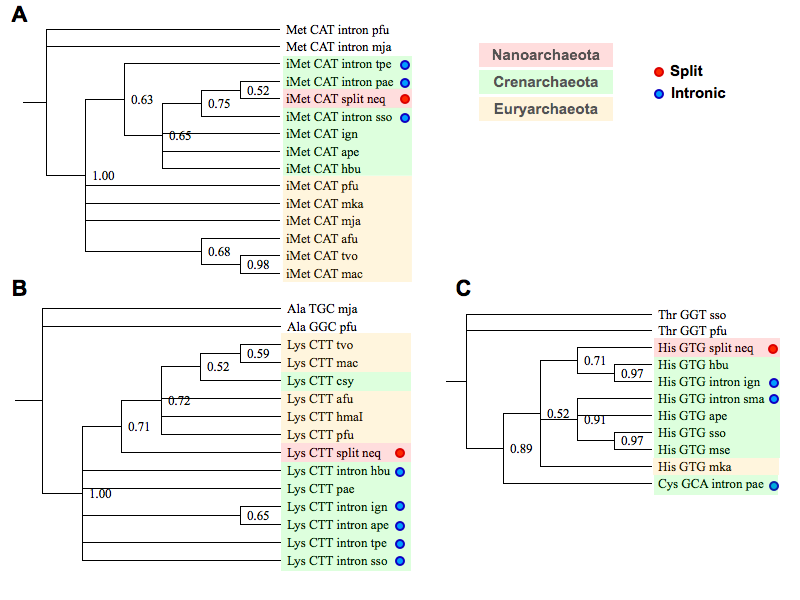


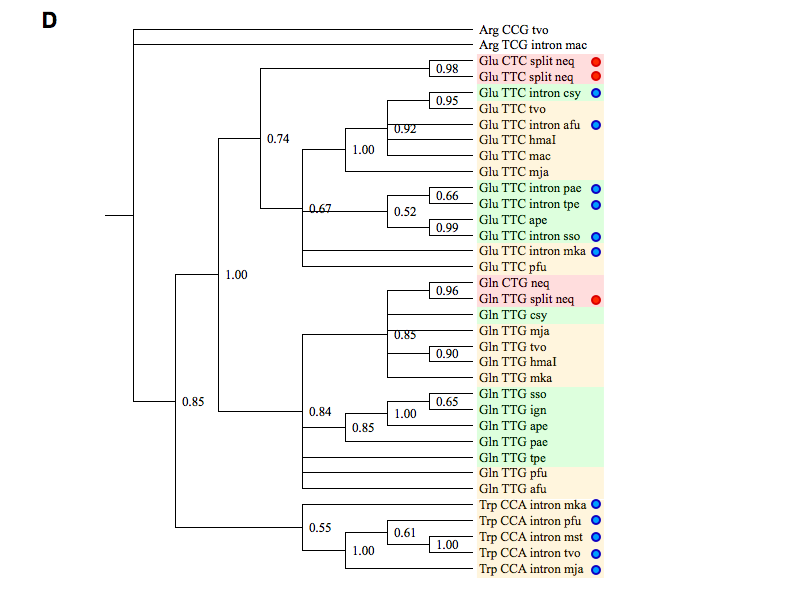


**Supplementary Figure 2. Bayesian phylogenetic trees of tRNA clusters containing split tRNAs.** Five tRNA clusters containing split tRNAs and an adjacent tRNA cluster as an outgroup were compared. (A) Phylogenetic tree of initiator tRNAiMet with tRNAeMet as an outgroup. (B) Phylogenetic tree of tRNALys with tRNAAla as an outgroup. (C) Phylogenetic tree of tRNAHis with tRNAThr as an outgroup. (D) Phylogenetic tree of tRNAGlu, tRNAGln and tRNATrp with tRNAArg as an outgroup.
